# Supplementary material
Source: Springer Nature journal article supplement (https://publikationen.ub.uni-frankfurt.de/opus4/files/6770/12862_2009_1085_MOESM1_ESM.pdf)
Supplement: MOESM1 [file 12862_2009_1085_MOESM1_ESM.pdf]

Additional material file1

Factorial correspondence analysis (FCA) was applied on multilocus genotypes to explore the distribution of genetic variation graphically (GENETIX 4.04 software).

Belkhir K, Borsa P, Chikli L, Raufaste N, Bonhomme F (1996) GENETIX 4.04, Logiciel Sous Windows TM Pour la Génétique des Populations. Montpellier: Laboratoire Génome, Université Montpellier.

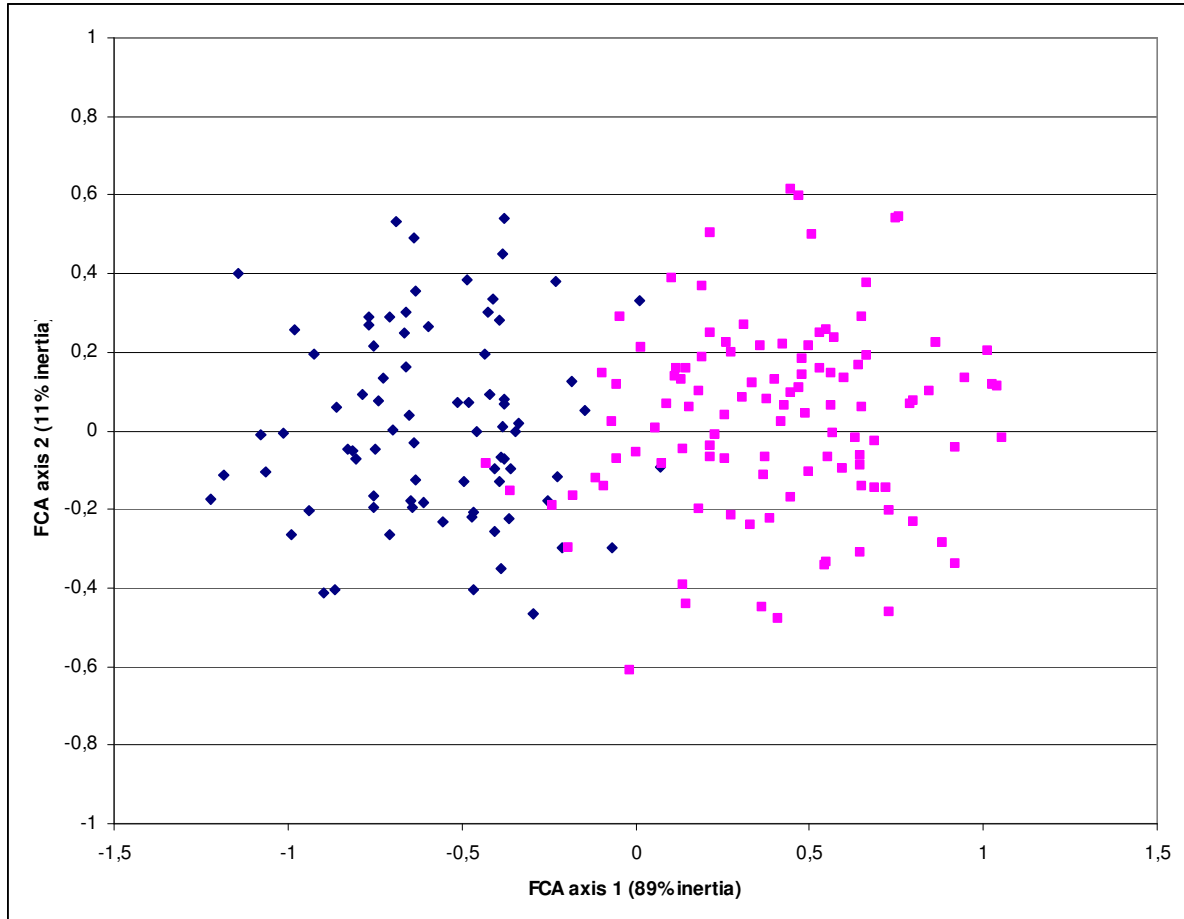

Figure 1: Factorial Correspondence Analysis of nuclear microsatellite variation. Shown is the position of the individuals, marked by their haplotype group, on the first two axes. Axis 1, representing 89% of total inertia, separates the haplotype groups with little overlap.

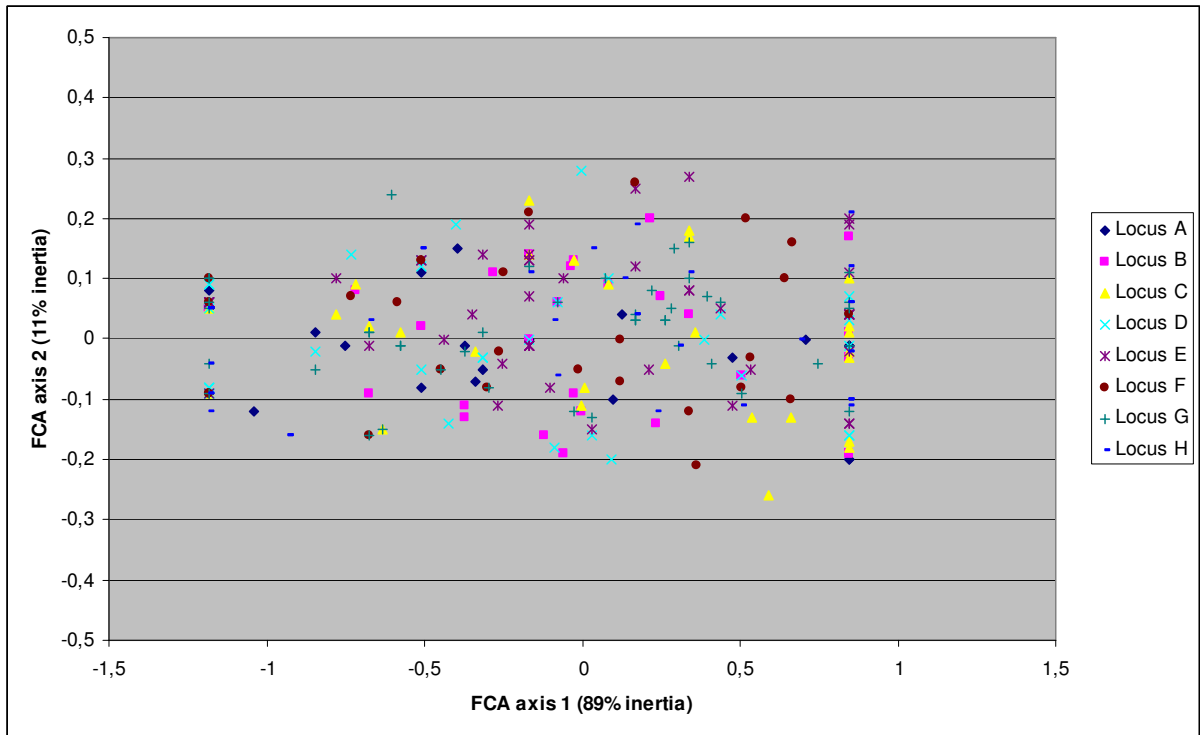

Figure 2. Factorial Correspondence Analysis of nuclear microsatellite variation. Shown is the position of the alleles, grouped per locus, on the first two axes. Alleles with the highest, respectively lowest score on the first axis are private alleles of the lineages. Note, however, that alleles seemingly shared among lineages need not necessarily indicate common ancestry as the length of microsatellites may represent homoplasious character states.
